# Supplementary material for: HvFT1 polymorphism and effect—survey of barley germplasm and expression analysis
Source: Front Plant Sci. 2014 Jun 6;5:251. doi: 10.3389/fpls.2014.00251 (PMC4047512; doi:10.3389/fpls.2014.00251)
Supplement: Table S1 — Barley accessions surveyed in this study classified according to the genetic constitution at vernalization and photoperiod genes. Countries of origin and row number are also indicated. [file DataSheet1.XLSX]

## Sheet: TableS1
Material surveyed in this study classified according to the genetic constitution at vernalization and photoperiod barley genes.
Countries of origin and row number are also indicated.
Genotype	Origin	Row number		VrnH1*	VrnH2*	PpdH1*	PpdH2*	mat-c*		HvFT1 (VrnH3)
Winter types										exon 1 copy number	promoter indel 1	promoter indel 2	intron 1 SNPs
Ager	France	6		Vrn1-6	Vrn2	Ppd1	Ppd2			1	139	146	AG
Aicara	Spain	2		vrn1	Vrn2	ppd1	Ppd2			1	139	142	TC
Albacete	Spain	6		Vrn1-4	Vrn2	Ppd1	Ppd2			1	139	142	TC
Almunia	Spain	6		Vrn1-6	Vrn2	Ppd1	ppd2			1	139	142	TC
Alpha	France	2		vrn1	Vrn2	ppd1	ppd2			1	139	142	TC
Angora	Germany	2		vrn1	Vrn2	ppd1	ppd2			1	139	142	TC
Arlois	France	6		vrn1	Vrn2	Ppd1	Ppd2			1	139	142	TC
Arturio	France	6		vrn1	Vrn2	ppd1	ppd2			1	139	142	TC
Athenais	Greece	6		Vrn1-4	Vrn2	Ppd1	Ppd2			1	135	146	TC
Athene	Germany	6		Vrn1-6	Vrn2	Ppd1	ppd2			1	135	146	AG
Azurel	France	6		Vrn1-6	Vrn2	Ppd1	ppd2			1	135	146	AG
Banteng	Germany	6		vrn1	Vrn2	Ppd1	ppd2			1	139	142	AG
Barberousse	France	6		vrn1	Vrn2	Ppd1	ppd2			1	139	142	TC
Bordia	Belgium	6		vrn1	Vrn2	Ppd1	Ppd2			1	139	142	TC
Candela	Spain	6		Vrn1-4	Vrn2	Ppd1	Ppd2			1	139	142	TC
Chopine	France	6		vrn1	Vrn2	Ppd1	ppd2			1	139	142	TC
Clarine	France	2		vrn1	Vrn2	Ppd1	ppd2			1	139	142	TC
Dea	Germany	6		vrn1	Vrn2	Ppd1	ppd2			1	139	142	TC
Dura	Germany	6		vrn1	Vrn2	Ppd1	ppd2			1	139	142	TC
Esterel	France	6		vrn1	Vrn2	Ppd1	ppd2			1	139	142	TC
Franka	Germany	6		vrn1	Vrn2	Ppd1	ppd2			1	139	142	TC
Frisia	Germany	6		vrn1	Vrn2	ppd1	Ppd2			1	135	146	AG
Gerbel	France	6		vrn1	Vrn2	Ppd1	ppd2			1	139	142	TC
Hauter	Germany-France	6		vrn1	Vrn2	Ppd1	ppd2			1	139	142	TC
Herfordia	Germany	6		vrn1	Vrn2	Ppd1	ppd2			1	139	142	TC
Hispanic	France	2		vrn1	Vrn2	Ppd1	Ppd2	Hap II		1	135	146	AG
Igri	Germany	2		vrn1	Vrn2	Ppd1	ppd2			1	139	142	TC
Ketos	France	6		vrn1	Vrn2	Ppd1	ppd2			1	135	146	AG
Labea	France	2		vrn1	Vrn2	ppd1	ppd2			1	139	142	TC
Mammuth	Canada	6		vrn1	Vrn2	Ppd1	ppd2			1	139	142	TC
Mirco	Italy	6		vrn1	Vrn2	Ppd1	ppd2			1	139	142	TC
Mogador	France	2		vrn1	Vrn2	ppd1	ppd2	Hap II		1	139	142	TC
Naturel	France	2		Vrn1-6	Vrn2	Ppd1	ppd2			1	139	142	TC
Nickela	Sweden	2		vrn1	Vrn2	ppd1	ppd2			1	135	146	AG
Ordalie	France	5		Vrn1-6	Vrn2	ppd1	ppd2			1	135	146	AG
Orria	CIMMYT	6		Vrn1-4	Vrn2	ppd1	ppd2	Hap I		1	135	146	TC
Pané	Spain	6		Vrn1-4	Vrn2	Ppd1	Ppd2			1	139	142	TC
Plaisant	France	6		vrn1	Vrn2	Ppd1	ppd2	Hap II		1	139	142	TC
Rebelle	France	6		vrn1	Vrn2	Ppd1	ppd2			1	135	146	AG
Regalia	France	6		vrn1	Vrn2	ppd1	ppd2			1	139	142	TC
S-36	ICARDA	6		Vrn1-4	Vrn2	Ppd1	Ppd2			1	135	146	TC
SBCC016	Spain	6		Vrn1-6	Vrn2	Ppd1	Ppd2	Hap II		1	139	142	AG
SBCC040	Spain	6		Vrn1-6	Vrn2	Ppd1	Ppd2			1	139	142	AG
SBCC041	Spain	6		Vrn1-6	Vrn2	Ppd1	ppd2			1	135	146	AG
SBCC049	Spain	6		Vrn1-6	Vrn2	Ppd1	Ppd2			1	139	142	TC
SBCC058	Spain	6		Vrn1-4	Vrn2	Ppd1	Ppd2			1	139	142	TC
SBCC071	Spain	6		Vrn1-6	Vrn2	Ppd1	Ppd2			1	139	142	AG
SBCC073	Spain	6		Vrn1-4	Vrn2	Ppd1	Ppd2	Hap II		1	139	142	TC
SBCC099	Spain	6		Vrn1-4	Vrn2	Ppd1	Ppd2			1	135	146	TC
SBCC106	Spain	6		Vrn1-6	Vrn2	Ppd1	Ppd2			1	139	142	TC
SBCC114	Spain	6		Vrn1-4	Vrn2	Ppd1	Ppd2			1	139	142	AG
SBCC116	Spain	6		Vrn1-4	Vrn2	Ppd1	Ppd2	Hap II		1	135	146	TC
SBCC145	Spain	6		Vrn1-4	Vrn2	Ppd1	Ppd2	Hap VI		1	135	146	TC
SBCC146	Spain	6		Vrn1-6	Vrn2	Ppd1	Ppd2	Hap II		1	139	142	AG
Senta	Germany	6		vrn1	Vrn2	Ppd1	ppd2			1	139	142	TC
Sonora	France	6		vrn1	Vrn2	Ppd1	ppd2			1	139	142	TC
Tapir	Netherlands	6		vrn1	Vrn2	Ppd1	ppd2			1	139	142	TC
Tipper	UK	2		vrn1	Vrn2	ppd1	Ppd2			1	139	142	TC
Vindicat	Netherlands	6		vrn1	Vrn2	Ppd1	ppd2			1	139	142	TC
Vogelsanger Gold	Germany	6		vrn1	Vrn2	Ppd1	ppd2			1	139	142	TC
Spring or Facultative types
Albaicin	Spain	2		Vrn1-3	vrn2	ppd1	Ppd2			1	139	142	TC
Alexis	Germany	2		Vrn1-3	vrn2	ppd1	Ppd2			1	139	142	TC
Asplund	Sweden	6		Vrn1-5	vrn2	ppd1	Ppd2			4	135	146	AG
Beatrix	Germany	2		Vrn1-3	vrn2	ppd1	Ppd2	Hap III		1	139	142	TC
Beka	France	2		Vrn1-1	vrn2	ppd1	Ppd2	Hap III		2	139	142	TC
Camelot	Germany	2		Vrn1-1	vrn2	ppd1	Ppd2			3	139	142	TC
Cameo	UK	2		Vrn1-1	Vrn2	ppd1	Ppd2			1	139	142	TC
Dobla	France	6		vrn1	vrn2	Ppd1	Ppd2	Hap II		5	139	142	TC
Gaelic	France	2		Vrn1-1	Vrn2	ppd1	ppd2			1	139	142	TC
Graphic	UK	2		Vrn1-1	vrn2	ppd1	Ppd2			1	139	142	TC
Hassan	Netherlands	2		Vrn1-3	Vrn2	ppd1	Ppd2			1	139	142	TC
Hatif de Grignon	France	6		vrn1	vrn2	Ppd1	ppd2			3	139	142	TC
Henni	Germany	2		Vrn1-5	vrn2	ppd1	Ppd2			3	139	142	TC
Herse	Norway	6		Vrn1-5	vrn2	ppd1	Ppd2			3	135	146	AG
Juli	Denmark	6		Vrn1-3	vrn2	ppd1	Ppd2	Hap III		4	135	146	AG
Kika	Spain	2		Vrn1-1	Vrn2	Ppd1	Ppd2			1	139	142	TC
Kors	Denmark	6		Vrn1-3	vrn2	ppd1	Ppd2			2	135	146	AG
Kym	UK	2		Vrn1-1	vrn2	ppd1	Ppd2			4	139	142	TC
Logan	USA	2		Vrn1-1	vrn2	ppd1	Ppd2	Hap I		1	135	146	TC
Maskin	Norway	6		Vrn1-5	vrn2	ppd1	Ppd2			3	135	146	AG
Meltan	Germany	2		Vrn1-3	vrn2	ppd1	Ppd2			3	135	146	TC
Monlon	France	6		vrn1	vrn2	Ppd1	ppd2			1	135	146	AG
Morex	USA	6		Vrn1-1	vrn2	ppd1	Ppd2	Hap I		1	135	146	AG
Nevada	France	2		Vrn1-1	vrn2	ppd1	Ppd2			1	139	142	TC
Olli	Finland	6		Vrn1-3	vrn2	ppd1	Ppd2			2	135	146	AG
Pallas	Sweden	2		Vrn1-1	vrn2	ppd1	Ppd2	Hap III		4	139	142	TC
PC-4	Spain	2		Vrn1-3	Vrn2	ppd1	Ppd2			1	139	142	TC
Ragusa B	Croatia	6		Vrn1-6	vrn2	Ppd1	ppd2			4	135	146	AG
S-45	ICARDA	6		Vrn1-1	Vrn2	Ppd1	Ppd2			1	135	146	TC
S-7	ICARDA	2		Vrn1-4	vrn2	Ppd1	Ppd2			1	135	146	TC
SBCC010	Spain	6		Vrn1-4	vrn2	Ppd1	ppd2	Hap III		2	135	146	AG
SBCC035	Spain	6		Vrn1-4	vrn2	Ppd1	ppd2			4	135	146	AG
SBCC090	Spain	6		Vrn1-3	vrn2	Ppd1	ppd2	Hap III		1	135	146	AG
SBCC133	Spain	6		Vrn1-4	vrn2	Ppd1	ppd2	Hap III		3	135	146	AG
SBCC153	Spain	2		Vrn1-1	Vrn2	Ppd1	Ppd2			1	139	142	AG
SBCC154	Spain	2		Vrn1-6	vrn2	Ppd1	Ppd2	Hap III		4	139	142	AG
SBCC157	Spain	2		Vrn1-4	vrn2	Ppd1	ppd2	Hap III		2	135	146	AG
Scarlett	Germany	2		Vrn1-1	vrn2	ppd1	Ppd2			1	139	142	TC
Seira	Sweden-Spain	2		Vrn1-3	vrn2	ppd1	Ppd2			2	135	146	TC
Stella	Sweden	6		Vrn1-5	vrn2	ppd1	Ppd2			2	135	146	AG
Steptoe	USA	6		Vrn1-4	vrn2	Ppd1	ppd2	Hap III		1	139	142	TC
Tammi	Finland	6		Vrn1-3	vrn2	ppd1	Ppd2	Hap III		4	135	146	AG
Tremois	France	2		Vrn1-7	vrn2	ppd1	Ppd2	Hap III		4	139	142	TC
Triumph	Germany	2		Vrn1-3	vrn2	ppd1	Ppd2			1	139	142	TC
Union	Germany	2		Vrn1-3	vrn2	ppd1	Ppd2			3	139	142	TC
Vega Svalof	Denmark-Sweden	6		Vrn1-3	vrn2	ppd1	Ppd2			4	135	146	AG
Volga	France	2		Vrn1-1	vrn2	ppd1	Ppd2			3	139	142	TC
Wisa	Germany	2		Vrn1-3	vrn2	ppd1	Ppd2			1	139	142	TC
Zaida	Spain	2		Vrn1-3	vrn2	ppd1	Ppd2			5	139	142	TC
* alleles typical of winter cultivars highlighted in grey
VrnH1 alleles, size of the first intron of HvBM5A, according to Hemming et al. (2009)
VrnH2 alleles, presence/absence of the HvZCCT genes as in Karsai et al. (2005)
VrnH3 alleles: two indels in the promoter, two SNPs in the first intron of HvFT1, as in Casas et al. (2011)
PpdH1 alleles: SNP22 in the last exonof HvPRR7, according to Turner et al. (2005)
PpdH2 alleles: presence/absence of HvFT3 as in Kikuchi et al. (2009)
Mat-c alleles: HvCEN4 haplotype according to Comadran et al. (2012)

## Sheet: Sheet2
Count of Genotype	Column Labels
Row Labels	1	>1	Grand Total
spring	21	28	49
AG	4	15	19
135	3	14	17
139	1	1	2
TC	17	13	30
135	3	2	5
139	14	11	25
winter	60		60
AG	16		16
135	9		9
139	7		7
TC	44		44
135	6		6
139	38		38
Grand Total	81	28	109

## Sheet: Hoja2
Genotype	growth habit	Origin	VrnH1*	VrnH2*	PpdH1*	PpdH2*	mat-c*	copies	exon 1 copy number	promoter indel 1	promoter indel 2	intron 1 SNPs
Athene	winter	Germany	Vrn1-6	D	D	R		1	1	135	146	AG
Azurel	winter	France	Vrn1-6	D	D	R		1	1	135	146	AG
Frisia	winter	Germany	vrn1	D	D	D		1	1	135	146	AG
Hispanic	winter	France	vrn1	D	D	D	Hap II	1	1	135	146	AG
Ketos	winter	France	vrn1	D	D	R		1	1	135	146	AG
Nickela	winter	Sweden	vrn1	D	R	R		1	1	135	146	AG
Ordalie	winter	France	Vrn1-6	D	R	R		1	1	135	146	AG
Rebelle	winter	France	vrn1	D	D	R		1	1	135	146	AG
SBCC041	winter	Spain	Vrn1-6	D	D	R		1	1	135	146	AG
Ager	winter	France	Vrn1-6	D	D	D		1	1	139	146	AG
Banteng	winter	Germany	vrn1	D	D	R		1	1	139	142	AG
SBCC016	winter	Spain	Vrn1-6	D	D	D	Hap II	1	1	139	142	AG
SBCC040	winter	Spain	Vrn1-6	D	D	D		1	1	139	142	AG
SBCC071	winter	Spain	Vrn1-6	D	D	D		1	1	139	142	AG
SBCC114	winter	Spain	Vrn1-4	D	D	D		1	1	139	142	AG
SBCC146	winter	Spain	Vrn1-6	D	D	D	Hap II	1	1	139	142	AG
Athenais	winter	Greece	Vrn1-4	D	D	D		1	1	135	146	TC
Orria	winter	CIMMYT	Vrn1-4	D	R	R	Hap I	1	1	135	146	TC
S-36	winter	ICARDA	Vrn1-4	D	D	D		1	1	135	146	TC
SBCC099	winter	Spain	Vrn1-4	D	D	D		1	1	135	146	TC
SBCC116	winter	Spain	Vrn1-4	D	D	D		1	1	135	146	TC
SBCC145	winter	Spain	Vrn1-4	D	D	D	Hap VI	1	1	135	146	TC
Aicara	winter	Spain	vrn1	D	R	D		1	1	139	142	TC
Albacete	winter	Spain	Vrn1-4	D	D	D		1	1	139	142	TC
Almunia	winter	Spain	Vrn1-6	D	D	R		1	1	139	142	TC
Alpha	winter	France	vrn1	D	R	R		1	1	139	142	TC
Angora	winter	Germany	vrn1	D	R	R		1	1	139	142	TC
Arlois	winter	France	vrn1	D	D	D		1	1	139	142	TC
Arturio	winter	France	vrn1	D	R	R		1	1	139	142	TC
Barberousse	winter	France	vrn1	D	D	R		1	1	139	142	TC
Bordia	winter	Belgium	vrn1	D	D	D		1	1	139	142	TC
Candela	winter	Spain	Vrn1-4	D	D	D		1	1	139	142	TC
Chopine	winter	France	vrn1	D	D	R		1	1	139	142	TC
Clarine	winter	France	vrn1	D	D	R		1	1	139	142	TC
Dea	winter	Germany	vrn1	D	D	R		1	1	139	142	TC
Dura	winter	Germany	vrn1	D	D	R		1	1	139	142	TC
Esterel	winter	France	vrn1	D	D	R		1	1	139	142	TC
Franka	winter	Germany	vrn1	D	D	R		1	1	139	142	TC
Gerbel	winter	France	vrn1	D	D	R		1	1	139	142	TC
Hauter	winter	Germany-France	vrn1	D	D	R		1	1	139	142	TC
Herfordia	winter	Germany	vrn1	D	D	R		1	1	139	142	TC
Igri	winter	Germany	vrn1	D	D	R		1	1	139	142	TC
Labea	winter	France	vrn1	D	R	R		1	1	139	142	TC
Mammuth	winter	Canada	vrn1	D	D	R		1	1	139	142	TC
Mirco	winter	Italy	vrn1	D	D	R		1	1	139	142	TC
Mogador	winter	France	vrn1	D	R	R	Hap II	1	1	139	142	TC
Naturel	winter	France	Vrn1-6	D	D	R		1	1	139	142	TC
Pané	winter	Spain	Vrn1-4	D	D	D		1	1	139	142	TC
Plaisant	winter	France	vrn1	D	D	R	Hap II	1	1	139	142	TC
Regalia	winter	France	vrn1	D	R	R		1	1	139	142	TC
SBCC049	winter	Spain	Vrn1-6	D	D	D		1	1	139	142	TC
SBCC058	winter	Spain	Vrn1-4	D	D	D		1	1	139	142	TC
SBCC073	winter	Spain	Vrn1-4	D	D	D	Hap II	1	1	139	142	TC
SBCC106	winter	Spain	Vrn1-6	D	D	D		1	1	139	142	TC
Senta	winter	Germany	vrn1	D	D	R		1	1	139	142	TC
Sonora	winter	France	vrn1	D	D	R		1	1	139	142	TC
Tapir	winter	Netherlands	vrn1	D	D	R		1	1	139	142	TC
Tipper	winter	UK	vrn1	D	R	D		1	1	139	142	TC
Vindicat	winter	Netherlands	vrn1	D	D	R		1	1	139	142	TC
Vogelsanger Gold	winter	Germany	vrn1	D	D	R		1	1	139	142	TC
Monlon	spring	France	vrn1	R	D	R		1	1	135	146	AG
Morex	spring	USA	Vrn1-1	R	R	D	Hap I	1	1	135	146	AG
SBCC090	spring	Spain	Vrn1-3	R	D	R		1	1	135	146	AG
SBCC153	spring	Spain	Vrn1-1	D	D	D		1	1	139	142	AG
Logan	spring	USA	Vrn1-1	R	R	D	Hap I	1	1	135	146	TC
S-45	spring	ICARDA	Vrn1-1	D	D	D		1	1	135	146	TC
S-7	spring	ICARDA	Vrn1-4	R	D	D		1	1	135	146	TC
Cameo	spring	UK	Vrn1-1	D	R	D		1	1	139	142	TC
Gaelic	spring	France	Vrn1-1	R	R	R		1	1	139	142	TC
Graphic	spring	UK	Vrn1-1	R	R	D		1	1	139	142	TC
Kika	spring	Spain	Vrn1-1	D	D	D		1	1	139	142	TC
Nevada	spring	France	Vrn1-1	R	R	D		1	1	139	142	TC
Scarlett	spring	Germany	Vrn1-1	R	R	D		1	1	139	142	TC
Albaicin	spring	Spain	Vrn1-3	R	R	D		1	1	139	142	TC
Alexis	spring	Germany	Vrn1-3	R	R	D		1	1	139	142	TC
Beatrix	spring	Germany	Vrn1-3	R	R	D	Hap III	1	1	139	142	TC
Hassan	spring	Netherlands	Vrn1-3	D	R	D		1	1	139	142	TC
PC-4	spring	Spain	Vrn1-3	D	R	D		1	1	139	142	TC
Triumph	spring	Germany	Vrn1-3	R	R	D		1	1	139	142	TC
Wisa	spring	Germany	Vrn1-3	R	R	D		1	1	139	142	TC
Steptoe	spring	USA	Vrn1-4	R	D	R	Hap III	1	1	139	142	TC
Kors	spring	Denmark	Vrn1-3	R	R	D		>1	2	135	146	AG
Olli	spring	Finland	Vrn1-3	R	R	D		>1	2	135	146	AG
SBCC010	spring	Spain	Vrn1-4	R	D	R		>1	2	135	146	AG
SBCC157	spring	Spain	Vrn1-4	R	D	R	Hap III	>1	2	135	146	AG
Stella	spring	Sweden	Vrn1-5	R	R	D		>1	2	135	146	AG
SBCC133	spring	Spain	Vrn1-4	R	D	R		>1	3	135	146	AG
Herse	spring	Norway	Vrn1-5	R	R	D		>1	3	135	146	AG
Maskin	spring	Norway	Vrn1-5	R	R	D		>1	3	135	146	AG
Juli	spring	Denmark	Vrn1-3	R	R	D	Hap III	>1	4	135	146	AG
Tammi	spring	Finland	Vrn1-3	R	R	D	Hap III	>1	4	135	146	AG
Vega Svalof	spring	Denmark-Sweden	Vrn1-3	R	R	D		>1	4	135	146	AG
SBCC035	spring	Spain	Vrn1-4	R	D	R		>1	4	135	146	AG
Asplund	spring	Sweden	Vrn1-5	R	R	D		>1	4	135	146	AG
Ragusa B	spring	Croatia	Vrn1-6	R	D	R		>1	4	135	146	AG
SBCC154	spring	Spain	Vrn1-6	R	D	D	Hap III	>1	4	139	142	AG
Seira	spring	Sweden-Spain	Vrn1-3	R	R	D		>1	2	135	146	TC
Meltan	spring	Germany	Vrn1-3	R	R	D		>1	3	135	146	TC
Beka	spring	France	Vrn1-1	R	R	D	Hap III	>1	2	139	142	TC
Hatif de Grignon	spring	France	vrn1	R	D	R		>1	3	139	142	TC
Camelot	spring	Germany	Vrn1-1	R	R	D		>1	3	139	142	TC
Volga	spring	France	Vrn1-1	R	R	D		>1	3	139	142	TC
Union	spring	Germany	Vrn1-3	R	R	D		>1	3	139	142	TC
Henni	spring	Germany	Vrn1-5	R	R	D		>1	3	139	142	TC
Kym	spring	UK	Vrn1-1	R	R	D		>1	4	139	142	TC
Pallas	spring	Sweden	Vrn1-1	R	R	D	Hap III	>1	4	139	142	TC
Tremois	spring	France	Vrn1-7	R	R	D	Hap III	>1	4	139	142	TC
Dobla	spring	France	vrn1	R	D	D	Hap II	>1	5	139	142	TC
Zaida	spring	Spain	Vrn1-3	R	R	D		>1	5	139	142	TC
* alleles typical of winter cultivars highlighted in grey
VrnH1 alleles, size of the first intron of HvBM5A, according to Hemming et al. (2009)
VrnH2 alleles, presence/absence of the HvZCCT genes as in Karsai et al. (2005)
VrnH3 alleles: two indels in the promoter, two SNPs in the first intron of HvFT1, as in Casas et al. (2011)
PpdH1 alleles: SNP22 in the last exonof HvPRR7, according to Turner et al. (2005)
PpdH2 alleles: presence/absence of HvFT3 as in Kikuchi et al. (2009)
Mat-c alleles: HvCEN4 haplotype according to Comadran et al. (2012)
